# Supplementary material for: The epidemiology of fatal cyclist crashes over a 14-year period in Alberta, Canada
Source: Springer Nature journal article supplement (doi:10.1186/s12889-015-2476-9), 2015-11-17
Supplement: MOESM1 [file 9750794]

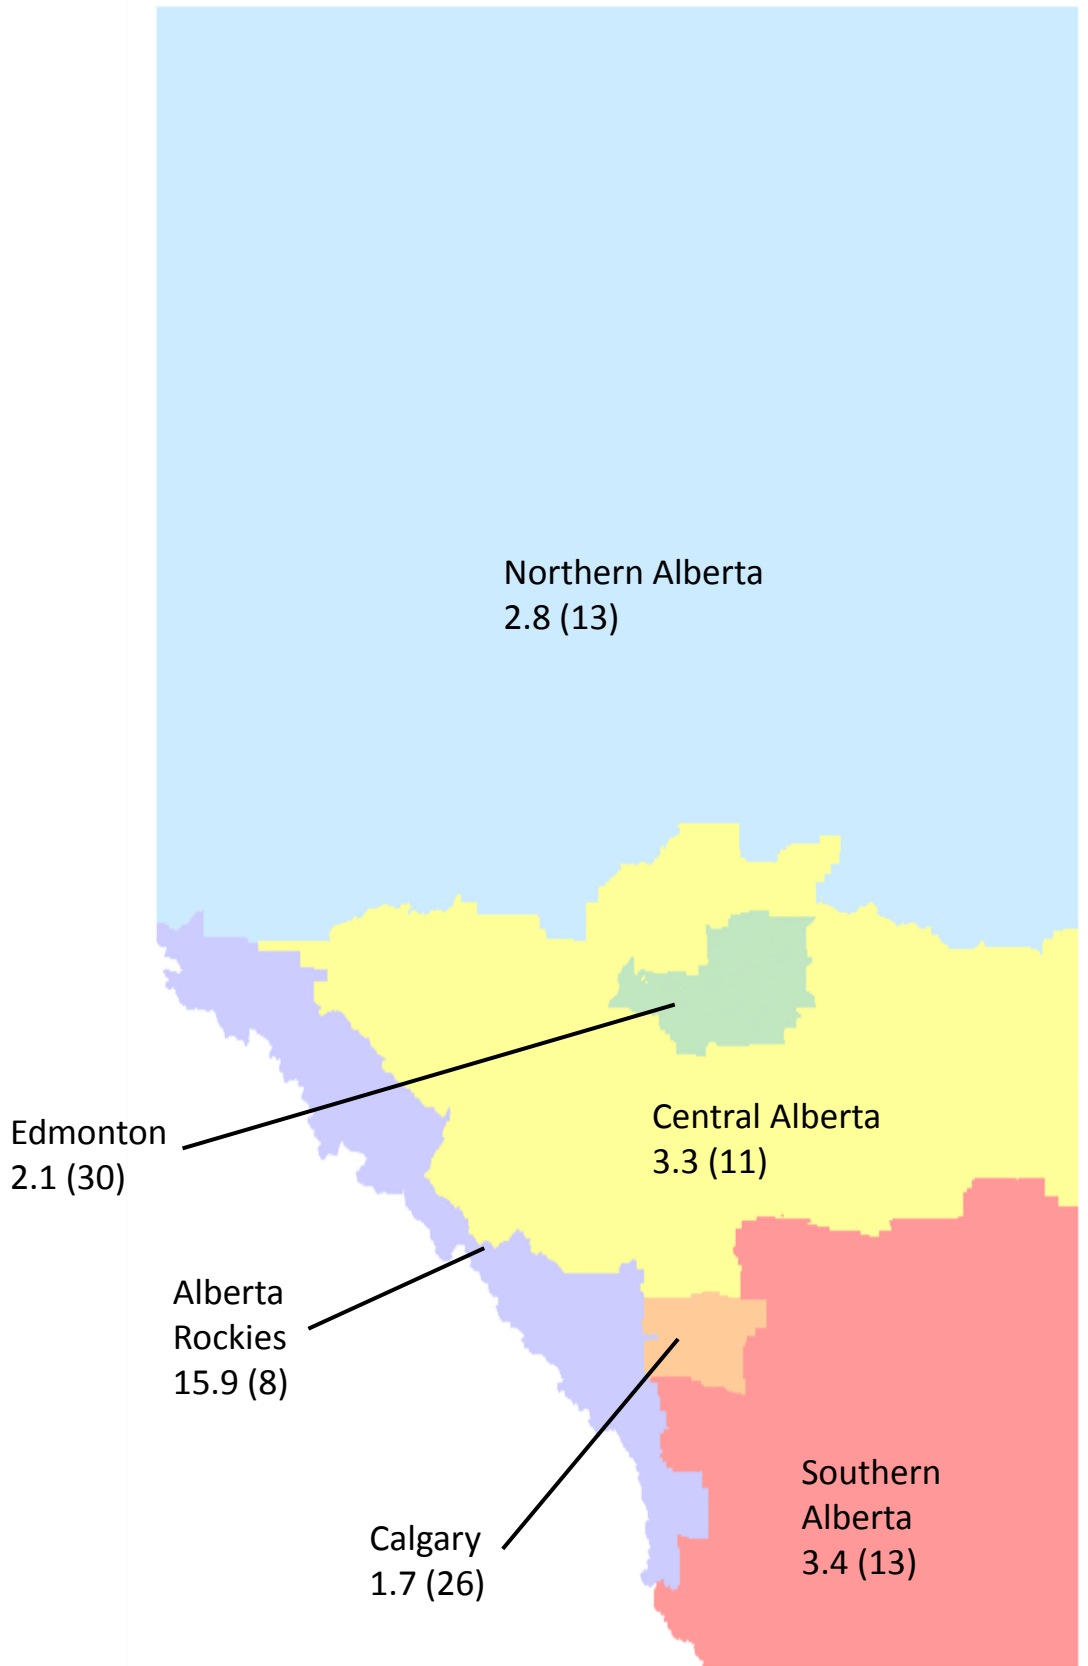

**Supplementary Figure 1.** Population-based rates per 1,000,000 population per year of fatal cycling crashes in Alberta from 1998 to 2011 by region. Numbers of events are in parentheses. Rates were calculated by dividing the number of events per region by person-years during the study period, which were estimated by multiplying the population of each region by the study duration (14 years)
